# Supplementary material for: A Dual Role of Osteopontin in Modifying B Cell Responses
Source: MDPI journal article supplement (doi:10.3390/biomedicines11071969), 2023-07-12
Supplement: s1 [file s1]

*Supplementary material*  
*for*  
**A dual role of osteopontin in modifying B cell responses**

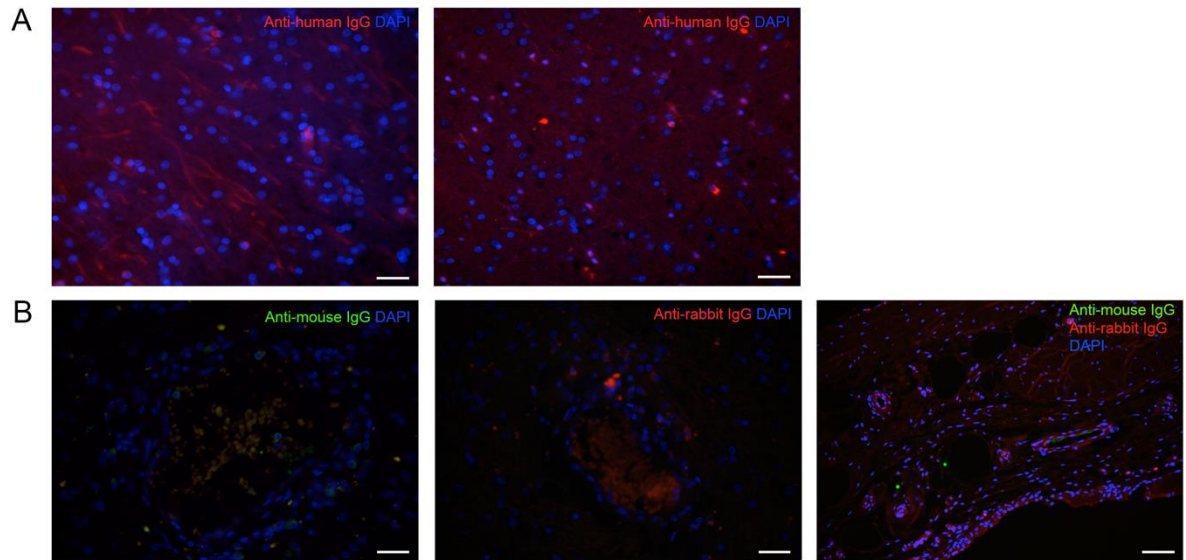

**Figure S1.** Control stainings for immunohistochemistry. (A) Representative images of  $n = 2$  MS brain tissue sections stained with polyclonal rabbit anti-human IgG and a Cy3-coupled anti-rabbit secondary antibody. Scale bars represent 50  $\mu\text{m}$ . (B) Brain tissue from an MS patient with CD20<sup>+</sup> B cell aggregates stained with Cy2- (left panel) or Cy3-coupled (middle panel) secondary antibody only, respectively, corresponding to the CD20 and OPN staining. Scale bars represent 50  $\mu\text{m}$ . Synovial tissue from a CD20<sup>+</sup> B cell aggregate-positive RA patient stained with both Cy2- and Cy3-coupled secondary antibodies (right panel) corresponding to the CD20 and OPN staining. The scale bar represents 100  $\mu\text{m}$ . MS = multiple sclerosis; OPN = osteopontin; RA = rheumatoid arthritis.

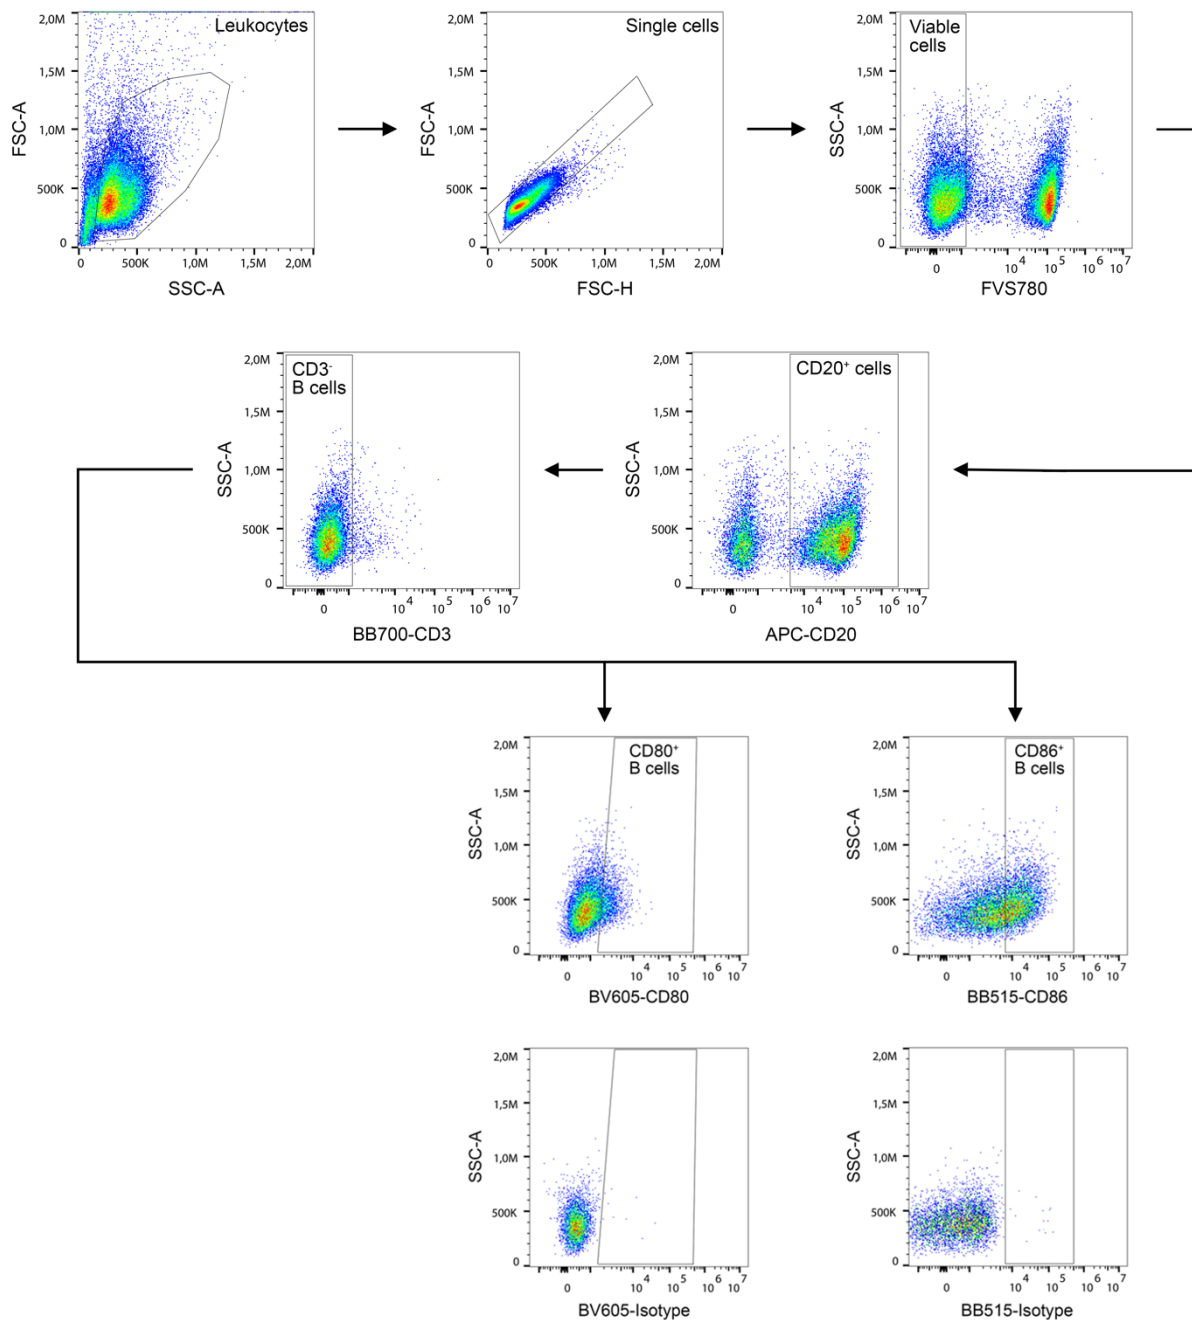

**Figure S2.** Representation of the gating strategy for B cell activation [1]. A leukocyte gate was set and single cells were determined by forward scatter (FSC)-height (FSC-H) and FSC-area (FSC-A). Dead cells were excluded, following which CD20<sup>+</sup> cells were identified and CD20<sup>+</sup>CD3<sup>-</sup> B cells were discriminated from the CD20<sup>+</sup>CD3<sup>+</sup> cell population. Finally, the CD20<sup>+</sup>CD3<sup>-</sup>CD80<sup>+</sup> and CD20<sup>+</sup>CD3<sup>-</sup>CD86<sup>+</sup> B cell populations were identified. Isotype controls (for CD80 and CD86 staining) were included for the gating strategy to identify the CD80<sup>+</sup> and CD86<sup>+</sup> B cell population.

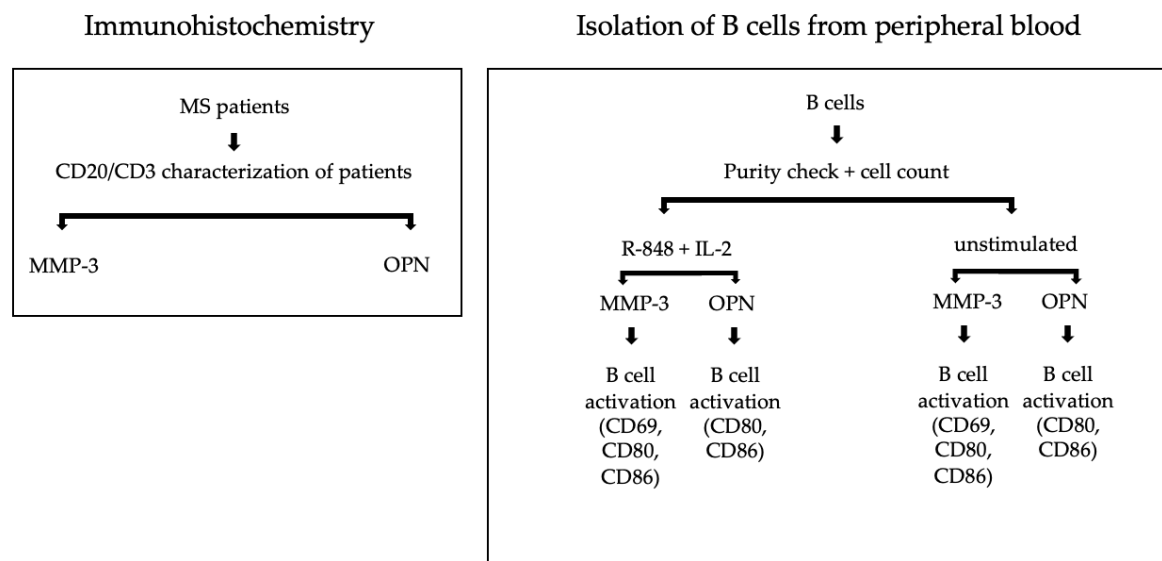

**Figure S3.** Materials and methods with an overlap between [1] and the current manuscript. MMP-3 = matrix metalloproteinase-3; OPN = osteopontin; R-848 = synthetic toll-like receptor 7/8 agonist.

|   | A              | B             | C             | D     | E     | F      | G                                        | H             |
|---|----------------|---------------|---------------|-------|-------|--------|------------------------------------------|---------------|
| 1 | Pos            | Pos           | Neg           | Neg   | GCSF  | GM-CSF | GRO<br>( $\alpha$ , $\beta$ , $\gamma$ ) | GRO- $\alpha$ |
| 2 | Pos            | Pos           | Neg           | Neg   | GCSF  | GM-CSF | GRO<br>( $\alpha$ , $\beta$ , $\gamma$ ) | GRO- $\alpha$ |
| 3 | IL-1 $\alpha$  | IL-2          | IL-3          | IL-5  | IL-6  | IL-7   | IL-8                                     | IL-10         |
| 4 | IL-1 $\alpha$  | IL-2          | IL-3          | IL-5  | IL-6  | IL-7   | IL-8                                     | IL-10         |
| 5 | IL-13          | IL-15         | IFN- $\gamma$ | MCP-1 | MCP-2 | MCP-3  | MIG                                      | RANTES        |
| 6 | IL-13          | IL-15         | IFN- $\gamma$ | MCP-1 | MCP-2 | MCP-3  | MIG                                      | RANTES        |
| 7 | TGF- $\beta$ 1 | TNF- $\alpha$ | TNF- $\beta$  | BLANK | BLANK | BLANK  | BLANK                                    | Pos           |
| 8 | TGF- $\beta$ 1 | TNF- $\alpha$ | TNF- $\beta$  | BLANK | BLANK | BLANK  | BLANK                                    | Pos           |

**Figure S4.** Layout of the antibody array used for investigating cytokines. GCSF = granulocyte colony-stimulating factor; GM-CSF = granulocyte-macrophage colony-stimulating factor; GRO = growth-regulated proteins; IL = interleukin; IFN = interferon; MCP = monocyte chemoattractant protein; MIG = monokine induced by gamma interferon; Pos = positive; Neg = negative; RANTES = regulated on activation, normal T cell expressed and secreted (also known as CCL5); TNF = tumor necrosis factor; TGF = transforming growth factor.

**Table S1.** Purity of B cells isolated from the different donors and their use in the different assays.

|        | Purity in %<br>(CD45 <sup>+</sup> CD19 <sup>+</sup> ) | B cell activation panel<br>(CD80, CD86) |                                 | ELISA<br>(IL-6/IL-10)                |
|--------|-------------------------------------------------------|-----------------------------------------|---------------------------------|--------------------------------------|
| Donors |                                                       | Unstimulated                            | Stimulated with<br>R-848 + IL-2 | Supernatant from<br>stimulated cells |
| 1      | 87.8                                                  |                                         | x                               | x                                    |
| 2      | 82.3*                                                 | x                                       |                                 |                                      |
| 3      | 94.6*                                                 | x                                       | x                               | x                                    |
| 4      | 87.3                                                  | x                                       | x                               | x                                    |
| 5      | 91.7                                                  |                                         | x                               | x                                    |
| 6      | 90.1                                                  |                                         | x                               | x                                    |
| 7      | 97.9*                                                 | x                                       |                                 |                                      |
| 8      | 91.9*                                                 | x                                       |                                 |                                      |
| 9      | 93.7                                                  |                                         | x                               | x                                    |
| 10     | 90.8                                                  | x                                       |                                 |                                      |

\* = B cells of donors used for both the current study and [1]; IL = interleukin; R-848 = synthetic toll-like receptor 7/8 agonist.

**Table S2.** Integrated densities of the dot blot array.

| Relative expression to Ctrl<br>[Sample/Ctrl] | Name of cytokine |
|----------------------------------------------|------------------|
| Not measurable                               | GCSF             |
|                                              | GM-CSF           |
|                                              | GRO              |
|                                              | GRO- $\alpha$    |
|                                              | IL-1a            |
|                                              | IL-2             |
|                                              | IL-3             |
|                                              | IL-5             |
| 0.888                                        | IL-6             |
| 0.075                                        | IL-7             |
| 2.716                                        | IL-8             |
| 1.100                                        | IL-10            |
| 0.870                                        | IL-13            |
| 0.527                                        | IL-15            |
| 0.155                                        | IFN- $\gamma$    |
| 0.762                                        | MCP-1            |
| Not measurable                               | MCP-2            |
|                                              | MCP-3            |
|                                              | MIG              |
| 2.497                                        | RANTES           |
| 0.895                                        | TGF- $\beta$ 1   |
| 0.903                                        | TNF- $\alpha$    |
| 1.290                                        | TNF- $\beta$     |

Ctrl = B cells without rOPN treatment; GCSF = granulocyte colony-stimulating factor; GM-CSF = granulocyte-macrophage colony-stimulating factor; GRO = growth- regulated proteins; IL = interleukin; IFN = interferon; MCP = monocyte chemoattractant protein; MIG = monokine induced by gamma interferon; Pos = positive; Neg = negative; rOPN = recombinant osteopontin; RANTES = regulated on activation, normal T cell expressed and secreted (also known as CCL5); Sample = B cells from the same donor with rOPN treatment; TNF = tumor necrosis factor; TGF = transforming growth factor.

### Supplementary references

1. Chunder, R.; Schropp, V.; Jabari, S.; Marzin, M.; Amor, S.; Kuerten, S. Identification of a novel role for matrix metalloproteinase-3 in the modulation of B cell responses in multiple sclerosis. *Front. Immunol.* **2022**, *13*, 1025377. <https://doi.org/10.3389/fimmu.2022.1025377>.
